# Supplementary material for: Cardiff cardiac ablation patient-reported outcome measure (C-CAP): validation of a new questionnaire set for patients undergoing catheter ablation for cardiac arrhythmias in the UK
Source: PubMed Central journal article supplement (PMC4870294; doi:10.1007/s11136-015-1194-1), 2015-12-10
Supplement: 11136_2015_1194_MOESM2_ESM.pdf [file 11136_2015_1194_MOESM2_ESM.pdf]

# Cardiff Cardiac Ablation PROM (C-CAP2)

Supplementary material

**Title:** Cardiff cardiac ablation PROM (C-CAP): a multi-centre validation study of a new questionnaire for patients undergoing catheter ablation for cardiac arrhythmias in the UK

**Journal:** Quality of Life Research

**Authors:** Judith White<sup>1</sup>, Kathleen L Withers<sup>1</sup>, Mauro Lencioni<sup>2</sup>, Grace Carolan-Rees<sup>1</sup>, Antony R Wilkes<sup>1</sup>, Kathryn A Wood<sup>3</sup>, Hannah Patrick<sup>4</sup>, David Cunningham<sup>5</sup>, Michael Griffith<sup>2</sup>

**Corresponding author:** Judith White (Cedar, Cardiff and Vale University Health Board, Cardiff Medicentre, Heath Park, Cardiff, CF14 4UJ); email: [Judith.white3@wales.nhs.uk](mailto:Judith.white3@wales.nhs.uk)

# Cardiff Cardiac Ablation PROM (C-CAP2)

## Arrhythmia Questionnaire – After your Operation

We would be grateful if you could give us some feedback on how you have been feeling since your procedure to treat your palpitations / fast or irregular heartbeats. Please answer **ALL** of the questions.

- 1) Please tick **ONE** box which best describes your symptoms **within the last 30 days** related to the **FREQUENCY** of the attacks of your palpitations / fast or irregular heartbeats (i.e. how **OFTEN** they occur):

My palpitations / fast or irregular heartbeats have: (please tick one)

|                      |  |
|----------------------|--|
| Stopped              |  |
| Become less frequent |  |
| Not changed          |  |
| Become more frequent |  |

- 2) Please tick **ONE** box which best describes your symptoms **within the last 30 days** related to the **LENGTH** of the attacks of your palpitations / fast or irregular heartbeats (i.e. how **LONG** they last):

The duration of my palpitations / fast or irregular heartbeats has: (please tick one)

|                   |  |
|-------------------|--|
| They have stopped |  |
| Become shorter    |  |
| Not changed       |  |
| Become longer     |  |

- 3) Please tick **ONE** box in **EACH** column which best describes your symptoms **within the last 30 days** related to your **tiredness and breathlessness**:

|                                 | Please tick one |
|---------------------------------|-----------------|
| I do not feel tired             |                 |
| I feel less tired               |                 |
| I feel no different (tiredness) |                 |
| I feel more tired               |                 |

|                                      | Please tick one |
|--------------------------------------|-----------------|
| I do not feel breathless             |                 |
| I feel less breathless               |                 |
| I feel no different (breathlessness) |                 |
| I feel more breathless               |                 |

# Cardiff Cardiac Ablation PROM (C-CAP2)

4) During your hospital stay, or in the month afterwards, did you experience any complications related to your ablation procedure?

Yes  No

5) Which complications (if any) were you **WARNED ABOUT** related to your procedure? Please tick ALL that you were warned about.

|                                                        |  |
|--------------------------------------------------------|--|
| None                                                   |  |
| Excessive bruising                                     |  |
| Wound site complications (eg. bleeding / swelling)     |  |
| Stroke                                                 |  |
| Blood around the heart requiring a needle to remove it |  |
| Air around the lung (pneumothorax)                     |  |
| Extended hospital stay (related to your procedure)     |  |
| Readmission to hospital (related to your procedure)    |  |

6) Which complications (if any) did you **EXPERIENCE** related to your procedure? Please tick ALL that you experienced:

|                                                               |  |
|---------------------------------------------------------------|--|
| No complications                                              |  |
| Excessive bruising                                            |  |
| Wound site complications (e.g. bleeding / swelling)           |  |
| Stroke                                                        |  |
| Blood around the heart requiring a needle to remove it        |  |
| Air around the lung (pneumothorax)                            |  |
| Extended hospital stay (related to your procedure)            |  |
| Readmission to hospital (related to your procedure)           |  |
| Other complication related to your procedure (please specify) |  |

7) Did the outcome of the procedure meet or exceed your expectations?

Yes  No

# Cardiff Cardiac Ablation PROM (C-CAP2)

The following questions are related to your condition and symptoms **SINCE** your recent procedure

- 8) Please circle the numbers below that most accurately indicate the severity of each symptom you have had **within the last 30 days**. Please circle **ONE** number for **EVERY** symptom. If you do not have the symptom please circle 0 (None).

|                                              | 0<br>None | 1<br>Mild | 2<br>Moderate | 3<br>Severe |
|----------------------------------------------|-----------|-----------|---------------|-------------|
| Palpitations / fast or irregular heartbeats  | 0         | 1         | 2             | 3           |
| Heart flutters                               | 0         | 1         | 2             | 3           |
| Extra heart beats / missed heart beats       | 0         | 1         | 2             | 3           |
| Fatigue / no energy                          | 0         | 1         | 2             | 3           |
| Dizziness / light-headedness / feeling faint | 0         | 1         | 2             | 3           |
| Hard to catch breath / short of breath       | 0         | 1         | 2             | 3           |
| Chest pressure as heart is racing            | 0         | 1         | 2             | 3           |
| Headache / migraine                          | 0         | 1         | 2             | 3           |
| Trouble concentrating                        | 0         | 1         | 2             | 3           |
| Neck pounding / neck pain / neck discomfort  | 0         | 1         | 2             | 3           |
| Trouble sleeping                             | 0         | 1         | 2             | 3           |
| Tiredness / sleepiness                       | 0         | 1         | 2             | 3           |
| Nausea / vomiting                            | 0         | 1         | 2             | 3           |
| Anxiety / fear / worry                       | 0         | 1         | 2             | 3           |

- 9) Since your ablation, how often do you usually get palpitations / fast or irregular heartbeats? **Please tick one only**

Never
  Once a month or less
  Several times a month
  Several times a week
  Several times a day

- 10) Since your ablation, how long do your episodes of palpitations / fast or irregular heartbeats usually last? **Please tick one only**

Not Applicable
  Less than 5 minutes
  5 minutes to 1 hour
  More than 1 hour but less than 12 hours
  12 hours or more

# Cardiff Cardiac Ablation PROM (C-CAP2)

- 11) Have your palpitations / fast or irregular heartbeats had any impact on the number of days you have attended work / school / college (including unpaid work, role as a carer and time spent job-seeking) **in the last 30 days**? If so, for how many days do you think it had an impact?

|                                                 |                      |                                                 |
|-------------------------------------------------|----------------------|-------------------------------------------------|
|                                                 | No of Days<br>(0-30) | I do not attend<br>work/ school/<br>college (✓) |
| Days you have missed at work / school / college |                      |                                                 |

- 12) Have your palpitations / fast or irregular heartbeats had any impact on your social activities **in the last 30 days**, and if so, for how many days do you think it has had an impact?

|                                                         |                      |
|---------------------------------------------------------|----------------------|
|                                                         | No of Days<br>(0-30) |
| Days you have had to cut down on your social activities |                      |

- 13) Have your palpitations / fast or irregular heartbeats had any impact on the number of days you have been able to carry out your normal daily activities (including household duties) **in the last 30 days**? If so, for how many days do you think it has had an impact?

|                                                                |                      |
|----------------------------------------------------------------|----------------------|
|                                                                | No of Days<br>(0-30) |
| Days you have been unable to carry out normal daily activities |                      |

- 14) How many times have you needed to visit a GP / Hospital **within the last 30 days** (related to your palpitations / fast or irregular heartbeats)?

GP

Hospital

- 15) Please circle the number that most accurately indicates how you feel about the following statements, please circle **ONE** number for **EVERY** statement. If you feel the statement does not apply to you please circle 0 (Not Applicable).

|                                                                                                      | 0<br>Not<br>Applicable | 1<br>Agree<br>Mildly | 2<br>Agree<br>Moderately | 3<br>Agree<br>Strongly |
|------------------------------------------------------------------------------------------------------|------------------------|----------------------|--------------------------|------------------------|
| I worry that my palpitations/fast or irregular heartbeats will start                                 | 0                      | 1                    | 2                        | 3                      |
| My everyday physical activities are limited                                                          | 0                      | 1                    | 2                        | 3                      |
| My palpitations have an impact on my own sport / leisure activities                                  | 0                      | 1                    | 2                        | 3                      |
| I worry about the effect of my heart rhythm on my health                                             | 0                      | 1                    | 2                        | 3                      |
| My palpitations / fast or irregular heartbeats interfere with my social activities                   | 0                      | 1                    | 2                        | 3                      |
| I am restricted in my travel / holiday plans                                                         | 0                      | 1                    | 2                        | 3                      |
| I am less confident due to my palpitations                                                           | 0                      | 1                    | 2                        | 3                      |
| My palpitations / fast or irregular heartbeats have an emotional / physical impact when I am driving | 0                      | 1                    | 2                        | 3                      |
| My palpitations have an impact on my family / friends                                                | 0                      | 1                    | 2                        | 3                      |

# Cardiff Cardiac Ablation PROM (C-CAP2)

16) Do you normally take any medication for your palpitations / fast or irregular heartbeat?

Yes

No

17) If you take medication for your palpitations / fast or irregular heartbeats is it?

a) More than before the procedure

b) The same as before the procedure

c) Less than before the procedure

The following questions are related to your GENERAL health:

18) Have you been told by a doctor that you have any of the following?  
(Please tick all that apply)

|                                                                                           |                                                                                                        |
|-------------------------------------------------------------------------------------------|--------------------------------------------------------------------------------------------------------|
| Liver disease <input type="checkbox"/>                                                    | High blood pressure <input type="checkbox"/>                                                           |
| Other heart condition e.g. angina, heart attack or heart failure <input type="checkbox"/> | Cancer (within the last 5 years) <input type="checkbox"/>                                              |
| Diabetes <input type="checkbox"/>                                                         | Leg pain when walking due to poor circulation <input type="checkbox"/>                                 |
| Lung disease e.g. asthma, chronic bronchitis or emphysema <input type="checkbox"/>        | Arthritis <input type="checkbox"/>                                                                     |
| Kidney disease <input type="checkbox"/>                                                   | Depression <input type="checkbox"/>                                                                    |
| Problems caused by stroke <input type="checkbox"/>                                        | Diseases of the nervous system e.g. Parkinson's disease or multiple sclerosis <input type="checkbox"/> |
